# Supplementary material
Source: PubMed Central journal article supplement (PMC4128912)
Supplement: NIHMS564813-supplement-Table_S1-S4.pdf [file NIHMS564813-supplement-Table_S1-S4.pdf]

**Table S1: Patient Characteristics Cohort I**

| <b>Characteristics Cohort I</b>                                                     |             |
|-------------------------------------------------------------------------------------|-------------|
| <b>Subjects: Pediatric/Adult (total)</b>                                            | 13/35 (48)  |
| <b>Age Range (years)</b>                                                            | 1-60        |
| <b>Average Age (years)</b>                                                          | 35.48±17.41 |
| <b>% Male</b>                                                                       | 60%         |
| <b>Primary Disease n (%)</b>                                                        |             |
| Aplastic anemia (AA)                                                                | 2 (4.2%)    |
| Acute lymphoblastic leukemia (ALL)                                                  | 10 (20.8%)  |
| Acute myeloid leukemia (AML)                                                        | 15 (31.2%)  |
| Chronic lymphocytic leukemia (CLL)                                                  | 1 (2.1%)    |
| Chronic myelogenous leukemia (CML)                                                  | 7 (14.6%)   |
| Hodgkin's                                                                           | 3 (6.2%)    |
| Myelodysplastic syndrome (MDS)                                                      | 7 (14.6%)   |
| Non-hodgkin lymphoma (NHL)                                                          | 3 (6.2%)    |
| <b>Conditioning Intensity - n (%)*</b>                                              |             |
| Radiation & Chemotherapy                                                            |             |
| TBI 1400 cGy/CY 1800 mg/M <sup>2</sup> x 2 doses                                    | 38 (79.2%)  |
| TBI 1375 cGy/CY 60mg/kg x 2 doses/ ATG 2.5 mg/kg x 1 dose/Thiotepa 5mg/kg x 2 doses | 1 (2.1%)    |
| Chemotherapy alone                                                                  |             |
| BU 0.5-1.1 mg/kg x 16 doses/CY 1500 mg/M <sup>2</sup> x 4 doses                     | 2 (4.2%)    |
| BU 0.8 mg/kg x 16 doses/ CY 1800 mg/M <sup>2</sup> x 2 doses                        | 5 (10.4%)   |
| CY 1500 mg/M <sup>2</sup> x doses/ATG 30 mg/kg x 3 doses                            | 1 (2.1%)    |
| CY 1500 mg/M <sup>2</sup> x doses/ATG 1.5 mg/kg x 4 doses                           | 1 (2.1%)    |
| <b>Donor Type - % MRD</b>                                                           | 77%         |

CY = cyclophosphamide, ATG = anti-thymocyte globulin, BU = busulfan

**Table S2: Patient Characteristics Cohort II**

| Characteristics Cohort II              |                                                                  | Boston      | Iowa        | Combined     |
|----------------------------------------|------------------------------------------------------------------|-------------|-------------|--------------|
| <b>Subjects (n)</b>                    |                                                                  | 63          | 138         | 201          |
| <b>Age Range (years)</b>               |                                                                  | 20-73       | 18-72       | 18-73        |
| <b>Age, mean ± SD (years)</b>          |                                                                  | 52.71±13.68 | 50.58±13.35 | 53.71±13.62  |
| <b>% Male</b>                          |                                                                  | 57%         | 55%         | 56%          |
| <b>Race/ethnicity</b>                  |                                                                  |             |             |              |
|                                        | African American                                                 | 0           | 3           | 3            |
|                                        | Asian                                                            | 2           | 0           | 2            |
|                                        | Caucasian                                                        | 58          | 135         | 193          |
|                                        | Hispanic                                                         | 1           | 0           | 1            |
|                                        | Unknown                                                          | 2           | 0           | 2            |
| <b>Primary Disease n (%)</b>           |                                                                  |             |             |              |
|                                        | Acute lymphoblastic leukemia (ALL)                               | 8 (12.7%)   | 15 (10.9%)  | 23 (11.4%)   |
|                                        | Acute myeloid leukemia (AML)                                     | 26 (41.3%)  | 29 (21.0%)  | 55 (27.4%)   |
|                                        | Chronic                                                          |             | 1 (0.7%)    | 1 (0.5%)     |
|                                        | Chronic myelogenous leukemia (CLL)                               | 6 (9.5%)    | 7 (5.1%)    | 13 (6.5%)    |
|                                        | Chronic myelogenous leukemia (CML)                               | 1 (1.6%)    | 5 (3.6%)    | 6 (3.0%)     |
|                                        | Hodgkin's                                                        | 5 (7.9%)    | 11 (8.0%)   | 16 (8.0%)    |
|                                        | Myelodysplastic syndrome (MDS)/ Myeloproliferative disease (MPD) | 4 (6.3%)    | 9 (6.5%)    | 13 (6.5%)    |
|                                        | Myeloma                                                          | 2 (3.2%)    | 31 (22.5%)  | 33 (16.4%)   |
|                                        | Non-hodgkin lymphoma (NHL)                                       | 11 (17.5%)  | 29 (21.0%)  | 40 (19.9%)   |
|                                        | Testicular                                                       |             | 1 (0.7%)    | 1 (0.5%)     |
| <b>Conditioning Intensity - n (%)*</b> |                                                                  |             |             |              |
|                                        | Myeloablative                                                    | 16 (25.4%)  | 54 (39.1%)  | 70 (34.8%)   |
|                                        | Non-myeloablative                                                | 44 (69.8%)  | 21 (15.2%)  | 65 (32.3%)   |
|                                        | Reduced intensity conditioning (RIC)                             |             | 1 (0.7%)    | 1 (0.5%)     |
|                                        | N/A                                                              | 3 (4.8%)    | 48 (34.8%)  | 51 (25.4%)   |
|                                        | No Transplant                                                    |             | 13 (9.4%)   | 13 (6.5%)    |
|                                        | Unknown                                                          |             | 1 (0.7%)    | 1 (0.5%)     |
| <b>Donor Type - % MRD**</b>            |                                                                  | 40%         | 46.67%      | 43.70%       |
| <b>Previous HSCT (% Positive)***</b>   |                                                                  | 22.22%      | 7.94%       | 12.70%       |
| <b>Transplant Type*</b>                |                                                                  |             |             |              |
|                                        | Allo                                                             | 59 (96.6%)  | 75 (60.0%)  | 134 (71.23%) |
|                                        | Auto                                                             | 3 (4.8%)    | 50 (40.1%)  | 53 (28.2%)   |
|                                        | Syngeneic                                                        | 1 (1.6%)    |             | 1 (0.5%)     |

\* Iowa - 13 patients did not have transplant, no conditioning info in clinical outcomes

\*\* Boston - 3 patients had auto transplant, Iowa 50 had auto transplant and 13 did not have transplant

\*\*\* 12 Iowa patients did not have prior transplant data in clinical outcomes

**Table S3: Cohort II VOD and DAH/IP Data**

| <b>Patients with VOD or IP/DAH</b> |                  |            |
|------------------------------------|------------------|------------|
|                                    | <b>(n/total)</b> | <b>(%)</b> |
| VOD                                | 4/182            | 2%         |
| Boston                             | 2/60             | 3%         |
| Iowa                               | 2/122            | 2%         |
| IP/DAH                             | 7/182            | 4%         |
| Boston                             | 0/60             | 0%         |
| Iowa                               | 7/122            | 6%         |
| <b>Total VOD/IP/DAH</b>            | <b>11/182</b>    | <b>6%</b>  |

VOD = veno-occlusive disease, DAH/IP = diffuse alveolar hemorrhage/interstitial pneumonia

**Table S4: mRNA data Day 0 versus Baseline**

| Gene            | ≥4 fold change (up) | P value      | Gene    | <4 fold change | P value | Gene | ≥4 fold change (down) | P value |
|-----------------|---------------------|--------------|---------|----------------|---------|------|-----------------------|---------|
| NFKBIA          | 27.04               | 0.088        | ACTB    | 3.90           | 0.139   | LTF  | -164.24               | 0.007   |
| <b>NFKB2</b>    | <b>25.52</b>        | <b>0.038</b> | IL1F7   | 3.63           | 0.303   |      |                       |         |
| <b>TNFRSF1A</b> | <b>23.61</b>        | <b>0.024</b> | TLR8    | 3.56           | 0.115   |      |                       |         |
| SERPINA1        | 23.56               | 0.061        | CASP4   | 3.42           | 0.303   |      |                       |         |
| <b>NFKB1</b>    | <b>19.58</b>        | <b>0.032</b> | NOS2A   | 3.35           | 0.317   |      |                       |         |
| TOLLIP          | 19.57               | 0.198        | C5      | 3.21           | 0.193   |      |                       |         |
| <b>CCR3</b>     | <b>18.52</b>        | <b>0.018</b> | PPBP    | 2.94           | 0.202   |      |                       |         |
| <b>MAPK14</b>   | <b>16.24</b>        | <b>0.003</b> | LY96    | 2.88           | 0.231   |      |                       |         |
| <b>TLR10</b>    | <b>15.54</b>        | <b>0.010</b> | CAMP    | 2.79           | 0.250   |      |                       |         |
| <b>IL1RAPL2</b> | <b>14.43</b>        | <b>0.034</b> | HMOX1   | 2.74           | 0.221   |      |                       |         |
| <b>DMBT1</b>    | <b>14.20</b>        | <b>0.034</b> | IL12RB2 | 2.64           | 0.422   |      |                       |         |
| <b>TLR6</b>     | <b>13.13</b>        | <b>0.005</b> | CD1D    | 2.59           | 0.305   |      |                       |         |
| IRAK1           | 12.65               | 0.051        | CD55    | 2.48           | 0.379   |      |                       |         |
| <b>FN1</b>      | <b>12.08</b>        | <b>0.033</b> | S100A12 | 2.44           | 0.388   |      |                       |         |
| <b>TLR2</b>     | <b>12.05</b>        | <b>0.012</b> | TGFB1   | 2.43           | 0.433   |      |                       |         |
| IRAK2           | 11.97               | 0.067        | TRAF6   | 2.42           | 0.534   |      |                       |         |
| <b>TNF</b>      | <b>11.72</b>        | <b>0.012</b> | TREM1   | 2.33           | 0.111   |      |                       |         |
| PROC            | 11.56               | 0.051        | TLR1    | 1.71           | 0.399   |      |                       |         |
| <b>IL1A</b>     | <b>11.32</b>        | <b>0.037</b> | MIF     | 1.63           | 0.608   |      |                       |         |
| <b>CXCR4</b>    | <b>11.22</b>        | <b>0.028</b> | IKKBK   | 1.57           | 0.632   |      |                       |         |
| <b>PTAFR</b>    | <b>10.89</b>        | <b>0.016</b> | IL1R1   | 1.40           | 0.791   |      |                       |         |
| <b>DEFB4</b>    | <b>10.76</b>        | <b>0.034</b> | HPRT1   | 1.18           | 0.837   |      |                       |         |
| <b>PGLYRP2</b>  | <b>10.61</b>        | <b>0.039</b> | GAPDH   | 1.17           | 0.844   |      |                       |         |
| <b>CRP</b>      | <b>10.59</b>        | <b>0.040</b> | CYBB    | 1.10           | 0.910   |      |                       |         |
| IFNB1           | 10.32               | 0.103        | IFNGR2  | -1.12          | 0.840   |      |                       |         |
| IL1F6           | 10.18               | 0.043        | NLRC4   | -1.16          | 0.715   |      |                       |         |
| <b>PGLYRP3</b>  | <b>10.14</b>        | <b>0.040</b> | IFNGR1  | -1.21          | 0.644   |      |                       |         |
| ADORA2A         | 9.90                | 0.143        | BPI     | -1.95          | 0.745   |      |                       |         |
| <b>LBP</b>      | <b>9.90</b>         | <b>0.045</b> | LYZ     | -2.20          | 0.166   |      |                       |         |
| <b>IL1RAP</b>   | <b>8.78</b>         | <b>0.006</b> | CHUK    | -2.36          | 0.338   |      |                       |         |
| COLEC12         | 8.48                | 0.055        |         |                |         |      |                       |         |
| IL1F9           | 8.16                | 0.057        |         |                |         |      |                       |         |
| <b>TLR4</b>     | <b>7.95</b>         | <b>0.001</b> |         |                |         |      |                       |         |
| IFNA1           | 7.93                | 0.129        |         |                |         |      |                       |         |
| IL1R2           | 7.47                | 0.083        |         |                |         |      |                       |         |
| NCF4            | 7.45                | 0.255        |         |                |         |      |                       |         |
| IL1F10          | 7.33                | 0.086        |         |                |         |      |                       |         |
| IL6             | 7.27                | 0.089        |         |                |         |      |                       |         |
| C8A             | 7.22                | 0.069        |         |                |         |      |                       |         |
| SFTPD           | 7.10                | 0.152        |         |                |         |      |                       |         |
| PGLYRP1         | 7.05                | 0.131        |         |                |         |      |                       |         |
| IL1RL2          | 6.87                | 0.090        |         |                |         |      |                       |         |
| IL1F5           | 6.81                | 0.091        |         |                |         |      |                       |         |
| IL1F8           | 6.78                | 0.076        |         |                |         |      |                       |         |
| LALBA           | 6.73                | 0.166        |         |                |         |      |                       |         |
| MYD88           | 6.47                | 0.055        |         |                |         |      |                       |         |
| CCL2            | 6.47                | 0.140        |         |                |         |      |                       |         |
| <b>IL1B</b>     | <b>6.33</b>         | <b>0.008</b> |         |                |         |      |                       |         |
| TLR3            | 6.30                | 0.112        |         |                |         |      |                       |         |
| MAPK8           | 6.12                | 0.054        |         |                |         |      |                       |         |
| SERPINE1        | 6.02                | 0.299        |         |                |         |      |                       |         |
| <b>IL1RN</b>    | <b>5.70</b>         | <b>0.014</b> |         |                |         |      |                       |         |
| IRF1            | 5.66                | 0.169        |         |                |         |      |                       |         |
| IL10            | 5.47                | 0.146        |         |                |         |      |                       |         |
| RPL13A          | 4.37                | 0.274        |         |                |         |      |                       |         |
| CD14            | 4.14                | 0.142        |         |                |         |      |                       |         |
| TLR9            | 4.12                | 0.117        |         |                |         |      |                       |         |
| CASP1           | 4.02                | 0.076        |         |                |         |      |                       |         |
